# Supplementary material for: Expression profile-based screening for critical genes reveals S100A4, ACKR3 and CDH1 in docetaxel-resistant prostate cancer cells
Source: publisher site journal article supplement (doi:10.18632/aging.102600), 2019-12-29
Supplement: Supplementary file [file aging-v11i24-102600-supplementary-material-SD1.pdf]

SUPPLEMENTARY FIGURES

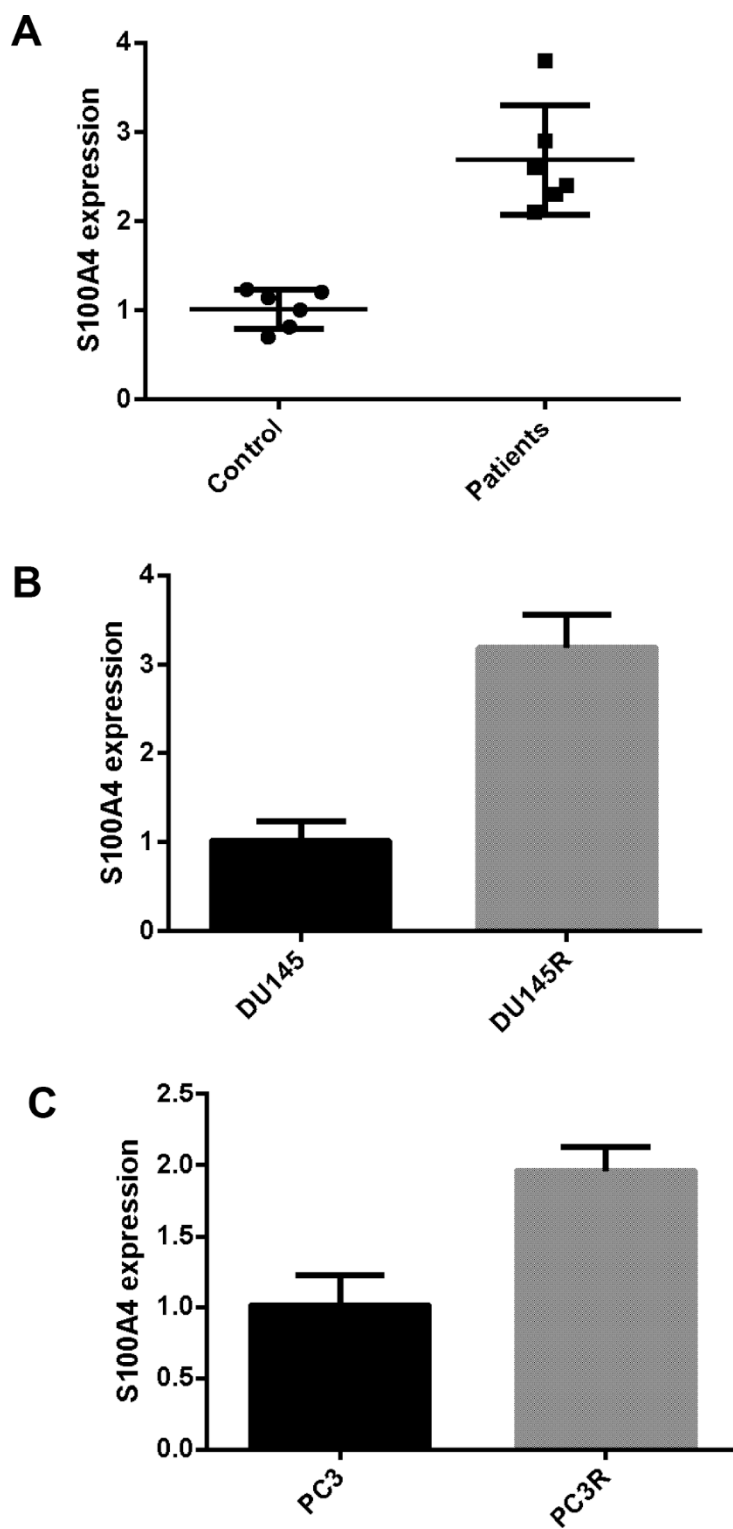

Supplementary Figure 1. Expression patterns of S100A4 were evaluated by qRT-PCR. (A) Samples from clinical PCa patients. (B) DU145 vs DU145R. (C) PC3 vs PC3R.

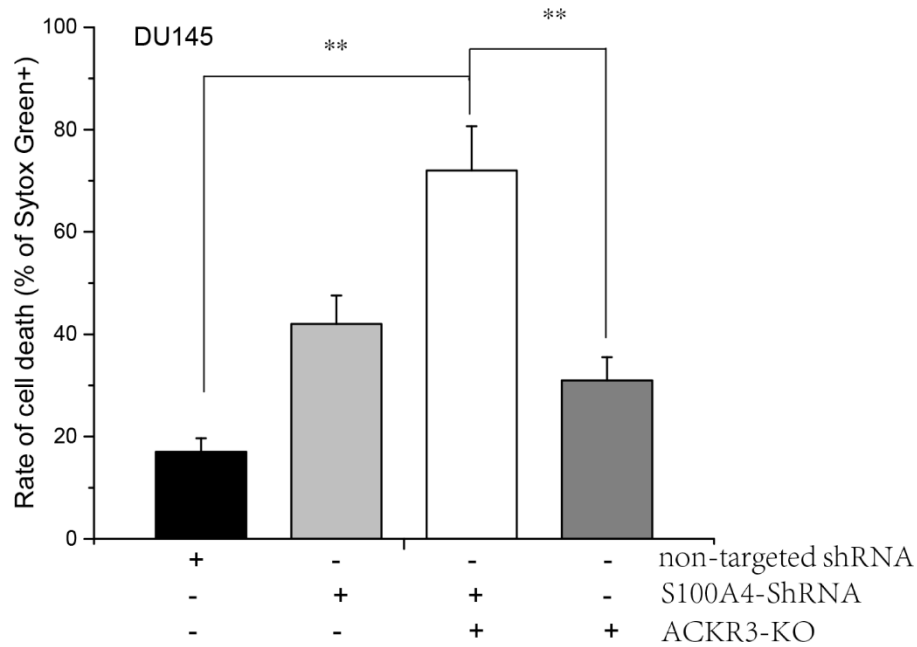

**Supplementary Figure 2. Cell viability of DU145R after treatment with ACKR3 knockout and/or S100A4 knockdown.** Cell viability was measured at 48 h of treatment and measured by sytox assay, 488 and 530 nm wavelengths were used for excitation and emission, respectively. \*P < 0.05, \*\*P < 0.01, \*\*\*P < 0.001.

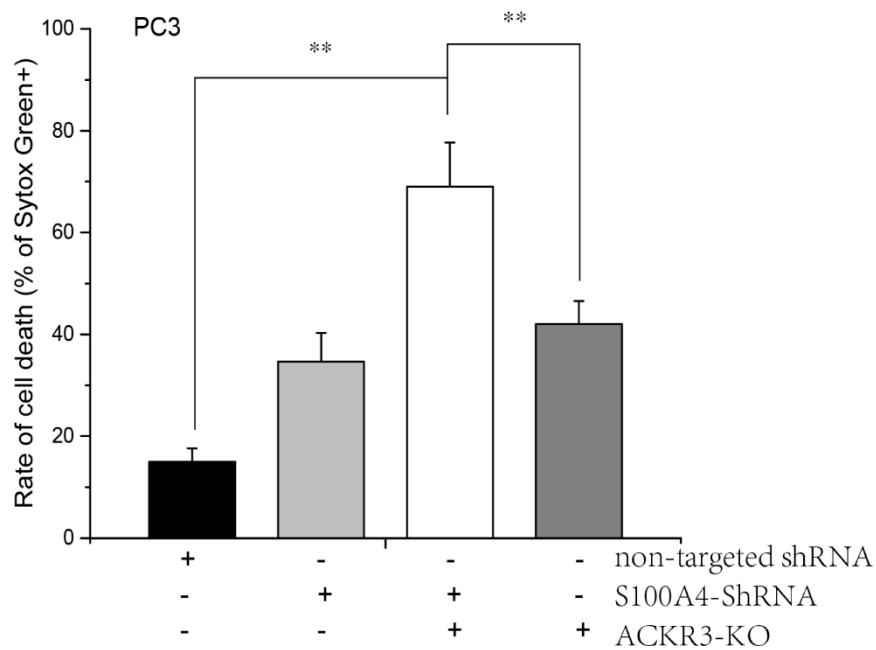

**Supplementary Figure 3. Cell viability of PC3R after treatment with ACKR3 knockout and/or S100A4 knockdown.** Cell viability was measured at 48 h of treatment and measured by sytox assay, 488 and 530 nm wavelengths were used for excitation and emission, respectively. \*P < 0.05, \*\*P < 0.01, \*\*\*P < 0.001.
